# Supplementary material for: Heterologous Expression of the Cotton NBS-LRR Gene GbaNA1 Enhances Verticillium Wilt Resistance in Arabidopsis
Source: Front Plant Sci. 2018 Feb 6;9:119. doi: 10.3389/fpls.2018.00119 (PMC5808209; doi:10.3389/fpls.2018.00119)
Supplement: Supplementary file 1 [file Data_Sheet_1.XLSX]

## Sheet: Sheet1
Table S1 Primers used in this study
Primer name	Primer sequence (5′-3′)	Purpose
Full length DNA and cDNA cloning
GbaNA1-FL-F	TTTAATGGCTGAACTCGTGGGG	Primers used for full length DNA and cDNA of GbaNA1 cloning
GbaNA1-FL-R	ATGCGTAGCGATAGCGGAACTT	Primers used for full length DNA and cDNA of GbaNA1 cloning
GhNA1-FL-F	TTAAAATAGTTCGACTAGCTGTA	Primers used for full length DNA and cDNA of GhNA1 cloning
GhNA1-FL-R	GTCACTTGAACTTTCGTACATC	Primers used for full length DNA and cDNA of GhNA1 cloning
Primers for expression analysis
GbaNA1-QF	GTTGTGGGGGAATGTGACGGAC	Primers used for GbaNA1 expression analysis
GbaNA1-QR	CATAGCTGAATTTTAAGGAGCC	Primers used for GbaNA1 expression analysis
GhNA1-QF	TAACAGTATCCCGGAACATCGA	Primers used for GhNA1 expression analysis
GhNA1-QR	GTATCAGCGCATATCTCCCTTG	Primers used for GhNA1 expression analysis
Gh-18S-F	CGGCTACCACATCCAAGGAA	Endogenous control for RT-qPCR
Gh-18S-R	TGTCACTACCTCCCCGTGTCA	Endogenous control for RT-qPCR
Primers for transformation vectors
GbaNA1-SacⅠ	GAGCTCATGGCTGAACTCGTGGGGCAAATC	Primers used for constructing GbaNA1 recombinant vector
GbaNA1-BestⅠ	TTCGAAGCCAACAGCTGGCCTCCACTC	Primers used for constructing GbaNA1 recombinant vector
GhNA1-SacⅠ	GAGCTCATGGCTGAACTCGTGGGGCAAAT	Primers used for constructing GhNA1 recombinant vector
GhNA1-BestⅠ	TTCGAATCCAGTATCAGCGCATATCT	Primers used for constructing GhNA1 recombinant vector
Primers for transgenic lines detection
GbaNA1-Det-F	TGAAAGATGGCTCAAGAAGGTA	Primers used for GbaNA1 transgenic lines detecting
GbaNA1-Det-R	CATATCCCGAATGTTTCTAACG	Primers used for GbaNA1 transgenic lines detecting
GhNA1-Det--F	TAACAGTATCCCGGAACATCGA	Primers used for GhaNA1 transgenic lines detecting
GhNA1-Det--R	GTATCAGCGCATATCTCCCTTG	Primers used for GhaNA1 transgenic lines detecting
Primers for transgenic lines RT-PCR detection
NA1-RT-F	TAACAGTATCCCGGAACATCGA	Primers used for GbaNA1and GhNA1 transgenic lines RT-PCR detecting
NA1-RT-R	GTATCAGCGCATATCTCCCTTG	Primers used for GbaNA1and GhNA1 transgenic lines RT-PCR detecting
Primers for fungal biomass detection
Vd-EF-1α-F	TGAGTTCGAGGCTGGTATCT	Primers used for quantative PCR of Verticillium dahliae
Vd-EF-1α-R	CACTTGGTGGTGTCCATCTT	Primers used for quantative PCR of Verticillium dahliae
Primers for detecting genes expression in Arabidopsis transgenic lines
ERF4-F	CTAAGGCTAAGACCAATTTCCCAACT	RT-qPCR for ERF4 gene
ERF4-R	CCGTCGCTGAAGGCACAACTAA	RT-qPCR for ERF4 gene
ERF104-F	GAGAACGGTTTCAACAAAGACA	RT-qPCR for ERF104 gene
ERF104-R	TAAGTCCCAAGCCAGATCCTAC	RT-qPCR for ERF104 gene
ERF8-F	GCTCCAACGAACCCGACTCATC	RT-qPCR for ERF8 gene
ERF8-R	TGTCGAACGTACCGAGCCAGAC	RT-qPCR for ERF8 gene
ERF3-F	TAACCTCCGTGGTCCTAAAGCC	RT-qPCR for ERF3 gene
ERF3-R	CTGTTGTTGATGGTCGGTGAAT	RT-qPCR for ERF3 gene
EIN2-F	GGTATGGTGCGTCTTATGGTCG	RT-qPCR for EIN2 gene
EIN2-R	AACTGCTCAAAGGGCTGTCTGG	RT-qPCR for EIN2 gene
ETR2-F	AGAAGTTGAGTGACGAGCAGAA	RT-qPCR for ETR2 gene
ETR2-R	ACAAACATCTCGCCATACAAGC	RT-qPCR for ETR2 gene
Endogenous control
Ar-UBQ1-F	TTCCTTGATGATGCTTGCTC	Reference for RT-PCR detecting and fungal biomass
Ar-UBQ1-R	TTGACAGCTCTTGGGTGAAG	Reference for RT-PCR detecting and fungal biomass
